# Supplementary material
Source: PubMed Central journal article supplement (PMC4346562)
Supplement: EC.00224-14_zek999094397so1.pdf [file EC.00224-14_zek999094397so1.pdf]

**Supplemental Table S1.** Primers used in this study.

---

| <b>Primer</b> | <b>Sequence (5' → 3')</b>         |
|---------------|-----------------------------------|
| P1            | ATGTCAATTACTAAAACATA              |
| P2            | CTATGTTTGTGACTGTTTTACTTC          |
| P3            | ATGATGTGCGCAAGCTACTCCT            |
| p4            | CTAAAACACTACTAGTAAATCCTTC         |
| TEC1-F1       | CCCAATTTCTCAGGGCCCTAGTCAGGTAG     |
| TEC1-R1       | GCAATTAAAGATTGGATCCCGCTAAACTAATG  |
| TEC1-F2       | CACTTACTCACTGCAGGATACATTAGTTTAGC  |
| TEC1-R2       | CTCTAATACAAGCCGCGGACAATTATGTAATCC |
| TEC1-SR       | GCAAAGAAGTGGAAACAAAAGAAACCC       |
| CaSAT1-F      | GGGCACTAAGCAGACAGCTCCTTGGC        |

---

Figure S1

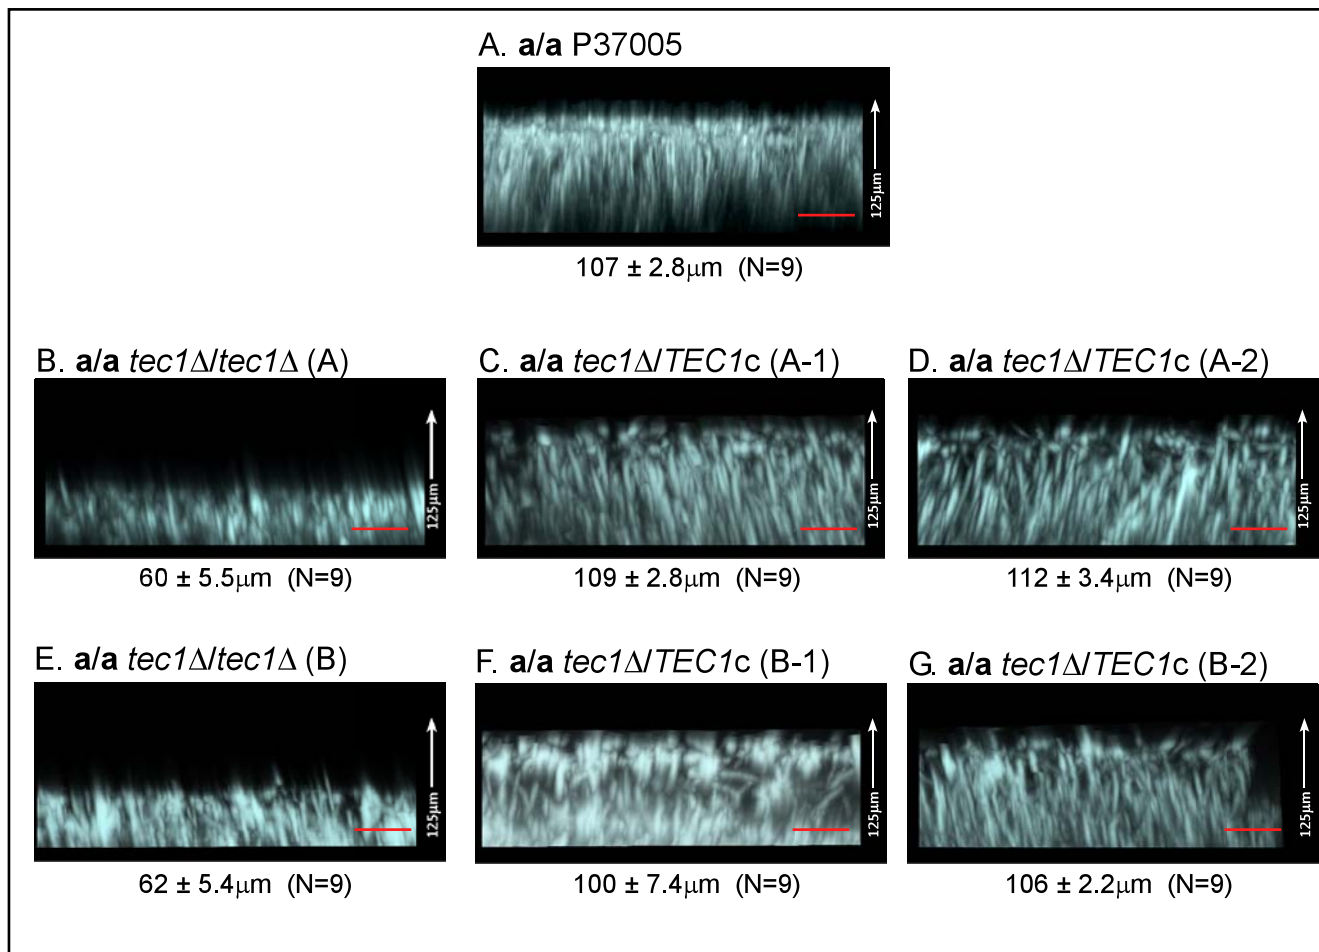

Supplemental Figure Legend

Figure S1. Complementation of the *a/a tec1Δ/tec1Δ* mutant by introducing wild type TEC1 into its native location, rescues the aberrant mutant phenotype. Mutants *a/a tec1Δ/tec1Δ* (A) and *a/a tec1Δ/tec1Δ* (B) were complemented to generate *a/a tec1Δ/TEC1c* (A-1) and (A-2), and mutants *a/a tec1Δ/TEC1c* (B-1) and *a/a tec1Δ/TEC1c* (B-2), respectively. Side views of a stack of 500 confocal microscopy scans are provided for each biofilm. A. *a/a* P37005. B. *a/a tec1Δ/tec1Δ* (A). C. *a/a tec1Δ/TEC1c* (A-1). D. *a/a tec1Δ/TEC1c* (A-2). E. *a/a tec1Δ/tec1Δ* (B). F. *a/a tec1Δ/TEC1c* (B-1). G. *a/a tec1Δ/TEC1c* (B-2). Thickness is presented as mean ± standard deviation (N=9). Scale bar = 20 μm.
